# Supplementary material for: Bifunctional additive-driven shape transitions of block copolymer particles through synergistic quaternization and protonation
Source: Royal Society of Chemistry journal article supplement (doi:10.1039/d5sc00259a), 2025-01-01
Supplement: d5sc00259a1.pdf [file d5sc00259a1.pdf]

## Supporting Information

# **Bifunctional Additive-Driven Shape Transitions of Block Copolymer Particles through Synergistic Quaternization and Protonation**

Zhengping Tan,<sup>1,#</sup> Soohyun Ban,<sup>2,#</sup> Younghyeon Ahn,<sup>1</sup> Kang Hee Ku,<sup>2,\*</sup> Bumjoon J. Kim<sup>1,\*</sup>

<sup>1</sup>Department of Chemical and Biomolecular Engineering, Korea Advanced Institute of Science and Technology (KAIST), Daejeon 34141, Republic of Korea

<sup>2</sup>School of Energy and Chemical Engineering, Ulsan National Institute of Science and Technology (UNIST), Ulsan 44919, Republic of Korea

\*E-mail: bumjoonkim@kaist.ac.kr (B.J.K), kangheeku@unist.ac.kr (K.H.K)

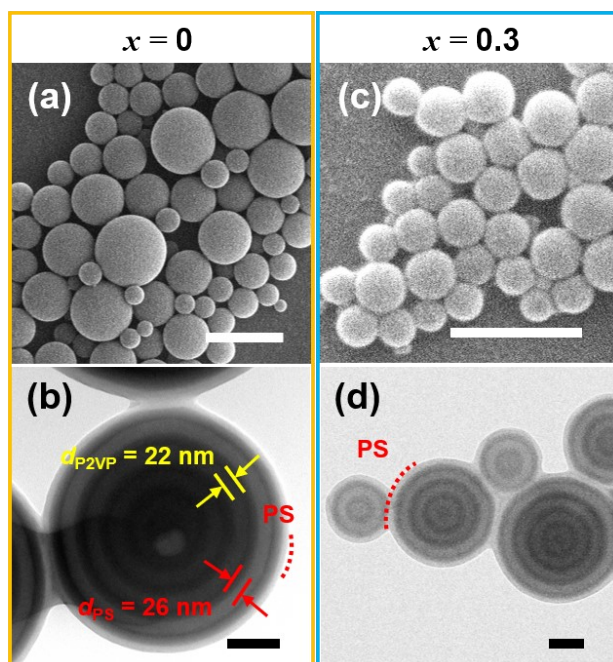

**Figure S1.** SEM and TEM images of PS-*b*-P2VP(BNA)<sub>*x*</sub> particles at (a, b)  $x = 0$  and (c, d)  $x = 0.3$ . Scale bars are 1  $\mu\text{m}$  in the SEM images and 100 nm in the TEM images.

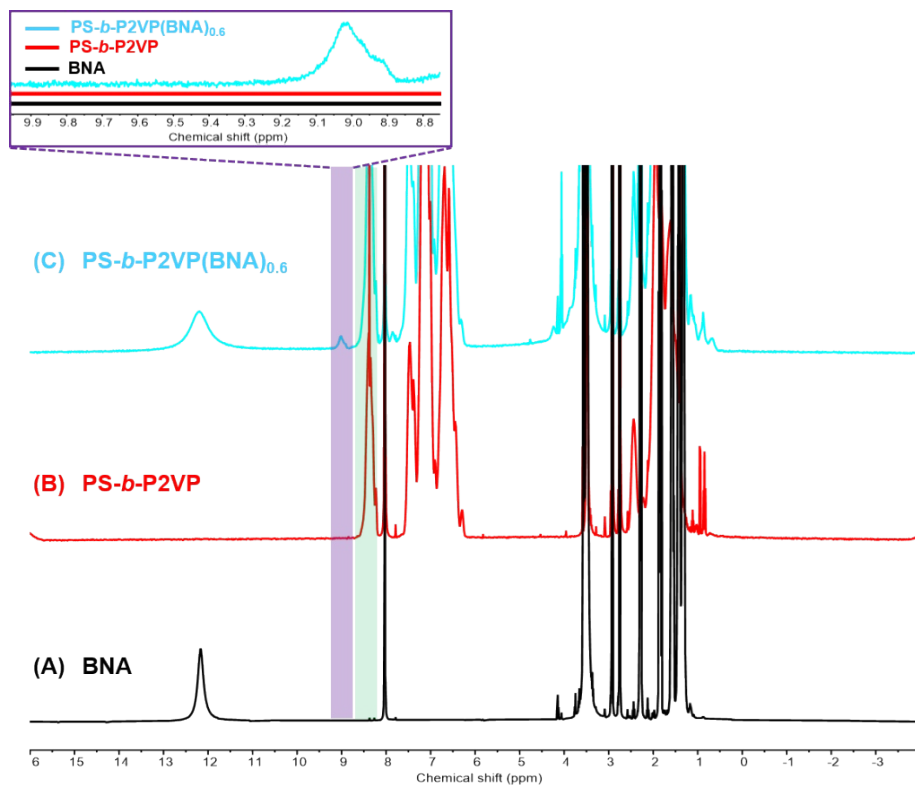

**Figure S2.**  $^1\text{H}$  NMR spectra of solution containing BNA, PS-*b*-P2VP, PS-*b*-P2VP(BNA) $_{0.6}$ . The new proton peaks highlighted by light purple framework between 8.8 ppm and 9.5 ppm in (C) indicate the reacted pyridine group of PS-*b*-P2VP while the light green framework in (B) or (C) indicate the non-reacted pyridine group of PS-*b*-P2VP. Inset above (C) is the magnified NMR between 8.8 ppm and 9.5 ppm for BNA, PS-*b*-P2VP, PS-*b*-P2VP(BNA) $_{0.6}$ .

**Table S1.** Interfacial tension ( $\gamma$ , mN m<sup>-1</sup>) between the polymer solution (i.e., PS<sub>50k</sub> or P2VP<sub>50k</sub> or P2VP<sub>50k</sub>(BNA)<sub>x</sub> in chloroform, 10 mg mL<sup>-1</sup>) and the aqueous surfactant solution (i.e., CTAB in water, 10 mg mL<sup>-1</sup>)

| PS             | P2VP           | P2VP(BNA) <sub>x</sub> |                |                |                |                |                |                |
|----------------|----------------|------------------------|----------------|----------------|----------------|----------------|----------------|----------------|
|                |                | <i>x</i> = 0.1         | <i>x</i> = 0.3 | <i>x</i> = 0.5 | <i>x</i> = 0.6 | <i>x</i> = 0.8 | <i>x</i> = 1.2 | <i>x</i> = 1.5 |
| 3.99 ±<br>0.25 | 4.66 ±<br>0.18 | 4.62 ±<br>0.28         | 4.51 ±<br>0.58 | 4.38 ±<br>0.13 | 4.26 ±<br>0.17 | 3.93 ±<br>0.24 | 3.48 ±<br>0.41 | 3.32 ±<br>0.31 |

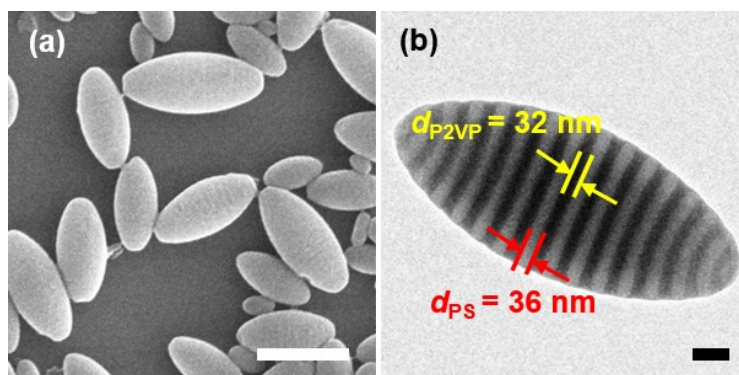

**Figure S3.** (a) SEM and (b) TEM images of ellipsoidal  $\text{PS}_{102\text{k}}\text{-}b\text{-P2VP}_{97\text{k}}$  particles prepared using a mixture of polyvinyl alcohol (PVA) and CTAB in a 4:1 weight ratio, creating a neutral preference of PS-*b*-P2VP to the surrounding aqueous medium. Scale bars are 1  $\mu\text{m}$  in the SEM image and 100 nm in the TEM image.

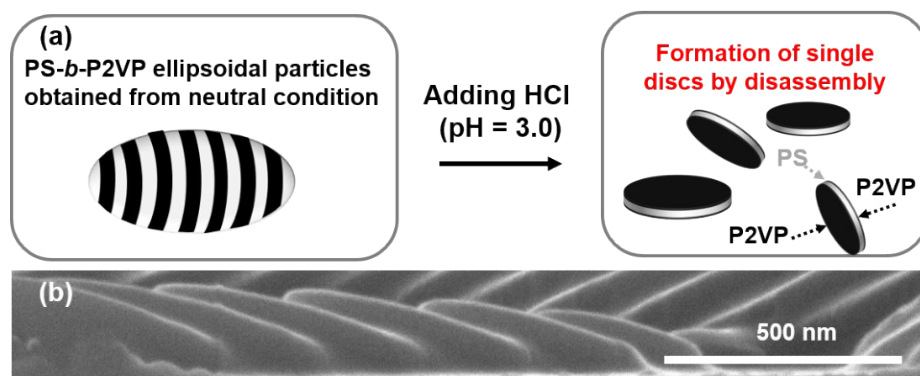

**Figure S4.** (a) Schematic illustration showing the production of PS-*b*-P2VP discs through disassembly of conventional ellipsoidal particles in acidic solution (pH = 3.0). (b) Side-view SEM images of PS<sub>102k</sub>-*b*-P2VP<sub>97k</sub> disc-like particles.

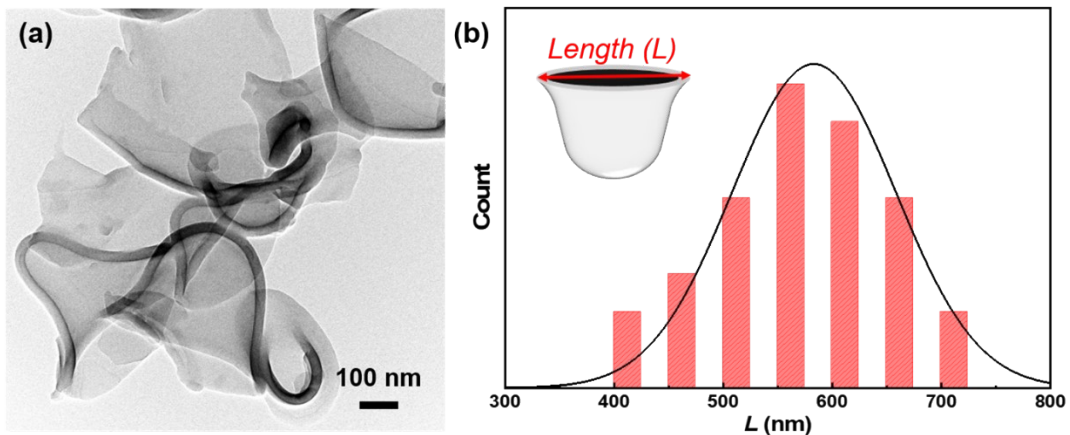

**Figure S5.** (a) TEM image of Janus cups. (b) Statistical distribution of  $L$  values for Janus cups, determined by analyzing 100 particles from TEM images.

**Table S2.** Degree of reaction of P2VP ( $\alpha$ , %) by BNA at different feed molar ratios ( $x$ ), which was determined by the molar fraction of reacted 2VP units in the reacted P2VP block [reacted  $n_{2VP}/(\text{reacted } n_{2VP} + n_{2VP})$ ].

| $x$ | $\alpha$ (%) |
|-----|--------------|
| 0.1 | 10.5         |
| 0.3 | 12.5         |
| 0.5 | 14.6         |
| 0.6 | 15.7         |
| 0.8 | 17.8         |
| 1.2 | 19.2         |
| 1.5 | 21.2         |



**Table S3.** The pH values of the PS-*b*-P2VP(BN)<sub>*x*</sub>, PS-*b*-P2VP(NA)<sub>*x*</sub>, PS-*b*-P2VP(BNA)<sub>*x*</sub> particle suspension at different feed molar ratios (*x*). The pH values were measured by pH meter (Ohaus ST3100 pH Bench).

| Particle suspension                         | pH value with |             |             |
|---------------------------------------------|---------------|-------------|-------------|
|                                             | BN            | NA          | BNA         |
| PS- <i>b</i> -P2VP (pristine)               | 6.96 ± 0.35   | 6.96 ± 0.35 | 6.96 ± 0.35 |
| PS- <i>b</i> -P2VP(additive) <sub>0.1</sub> | 6.86 ± 0.42   | 6.81 ± 0.33 | 6.86 ± 0.44 |
| PS- <i>b</i> -P2VP(additive) <sub>0.3</sub> | 6.82 ± 0.15   | 5.72 ± 0.27 | 5.57 ± 0.19 |
| PS- <i>b</i> -P2VP(additive) <sub>0.5</sub> | 6.89 ± 0.26   | 5.12 ± 0.38 | 4.89 ± 0.32 |
| PS- <i>b</i> -P2VP(additive) <sub>0.6</sub> | 6.91 ± 0.47   | 4.85 ± 0.19 | 4.61 ± 0.27 |
| PS- <i>b</i> -P2VP(additive) <sub>0.8</sub> | 6.85 ± 0.29   | 4.73 ± 0.22 | 4.52 ± 0.35 |
| PS- <i>b</i> -P2VP(additive) <sub>1.2</sub> | 6.94 ± 0.32   | 3.89 ± 0.43 | 3.68 ± 0.34 |
| PS- <i>b</i> -P2VP(additive) <sub>1.5</sub> | 6.83 ± 0.18   | 3.45 ± 0.21 | 3.25 ± 0.21 |

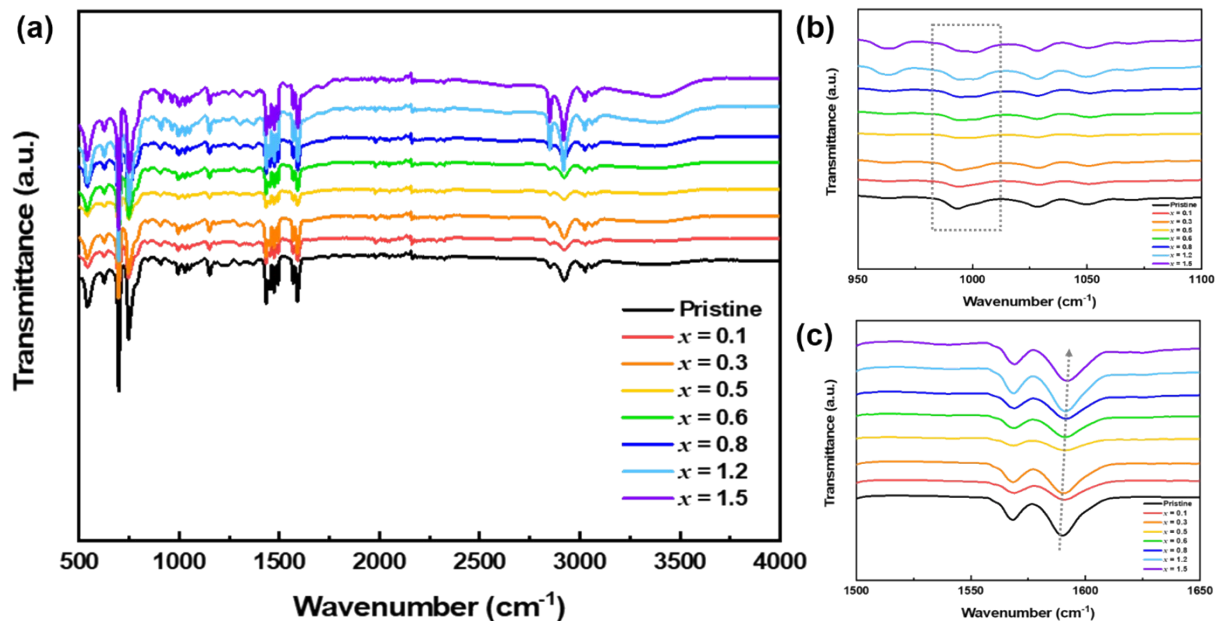

**Figure S6.** FTIR spectra of  $\text{PS}_{102\text{k}}\text{-}b\text{-P2VP}_{97\text{k}}(\text{BNA})_x$  particles obtained at different  $x$  values. (a) The full FTIR spectra and (b, c) amplified FTIR spectra of  $\text{PS}_{102\text{k}}\text{-}b\text{-P2VP}_{97\text{k}}(\text{BNA})_x$  particles obtained at different  $x$  values (b) from  $950\text{ cm}^{-1}$  to  $1100\text{ cm}^{-1}$  and (c) from  $1500\text{ cm}^{-1}$  to  $1650\text{ cm}^{-1}$ . Framework in (b) indicates the broadened spectra around  $1000\text{ cm}^{-1}$  after quaternization while the arrow in (c) indicates the shift after protonation.

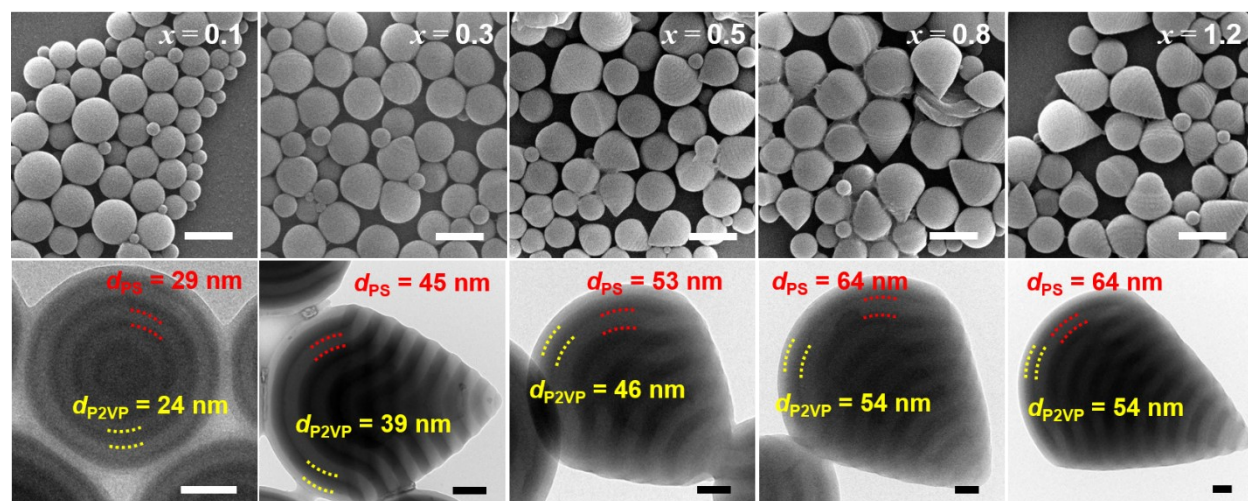

**Figure S7.** SEM and TEM images of PS-*b*-P2VP(BN)<sub>x</sub> particles at different *x* values. Scale bars are 1  $\mu$ m in the SEM image and 100 nm in the TEM image.

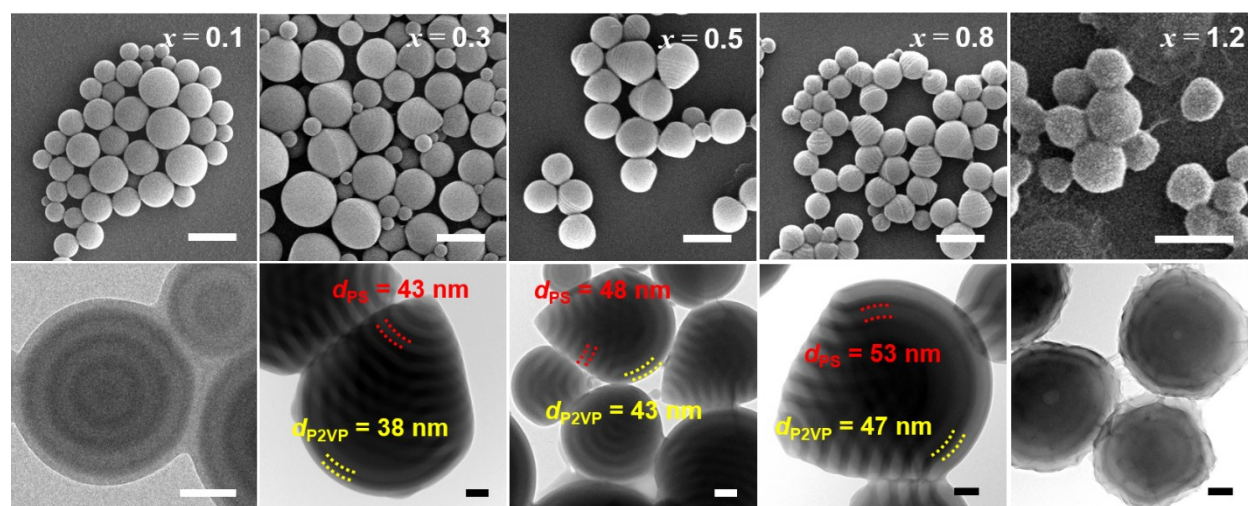

**Figure S8.** SEM and TEM images of PS-*b*-P2VP(NA)<sub>x</sub> particles at different *x* values. Scale bars are 1  $\mu$ m in the SEM image and 100 nm in the TEM image.

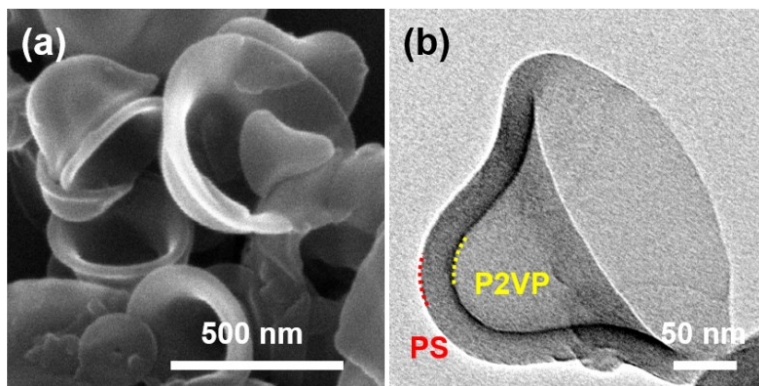

**Figure S9.** (a) SEM and (b) TEM images of Janus cups after crosslinked with dibromobutane for 24 h.
